# Supplementary material for: Development of an optical sensor for the determination of phenolic compounds in environmental samples
Source: Royal Society of Chemistry journal article supplement (doi:10.1039/d3ay01699d), 2023-01-01
Supplement: d3ay01699d1.pdf [file d3ay01699d1.pdf]

## Supplementary material

to

### Development of Optical Sensor for Determination of Phenolic Compounds in Environmental Samples

Gasser M. Khairy <sup>1\*</sup>, Esraa I. Ali <sup>1</sup>, Eman M. Saad <sup>2</sup>

<sup>1</sup> Chemistry Department, Faculty of Science, Suez Canal University, Ismailia 41522, Egypt.

<sup>2</sup> Chemistry Department, Faculty of Science, Suez University, Suez, Egypt.

Corresponding Authors

Gasser M. Khairy: [gasser\\_mostafa@science.suez.edu.eg](mailto:gasser_mostafa@science.suez.edu.eg), Tel: 00201022823954

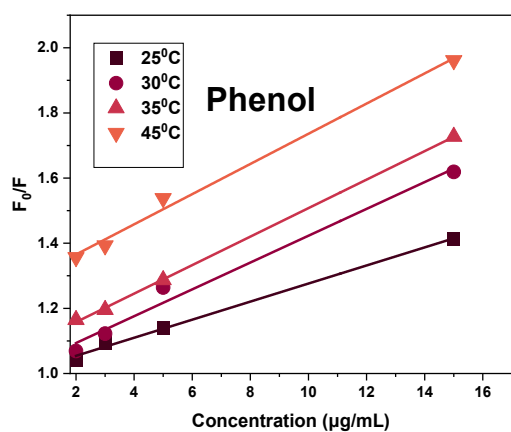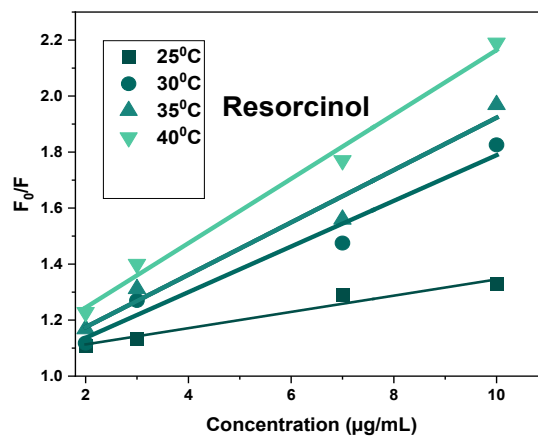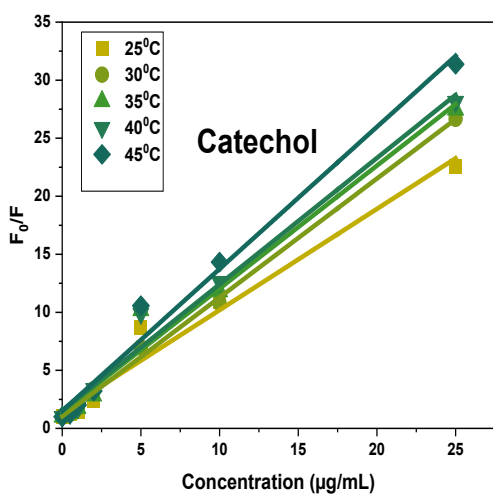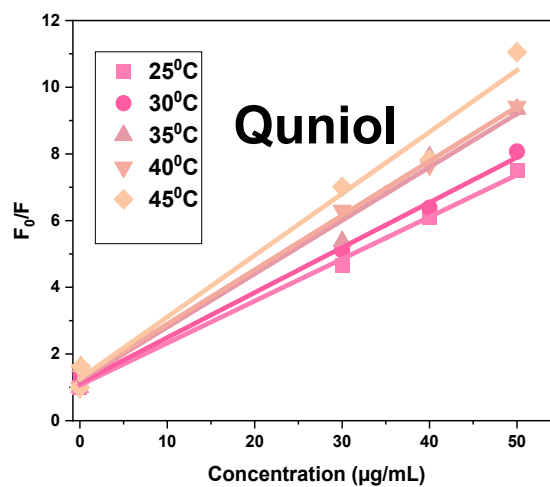

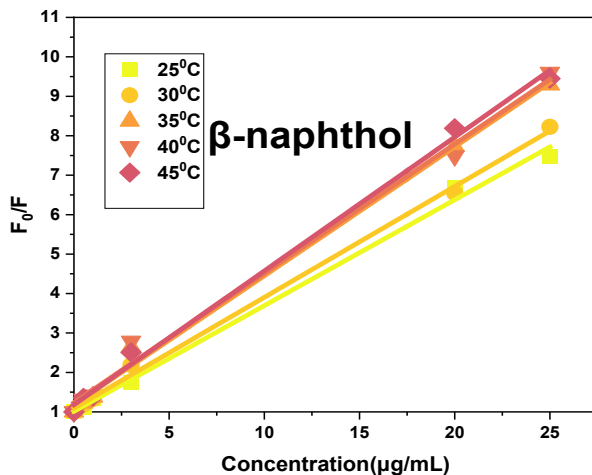

**Figure 1S.** Stern–Volmer plots for the reaction of Eu(III)-complex and phenolic compounds in PIPES buffer (pH=7.5) at different temperatures

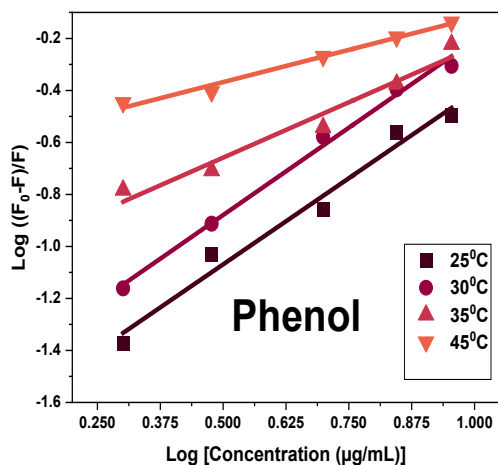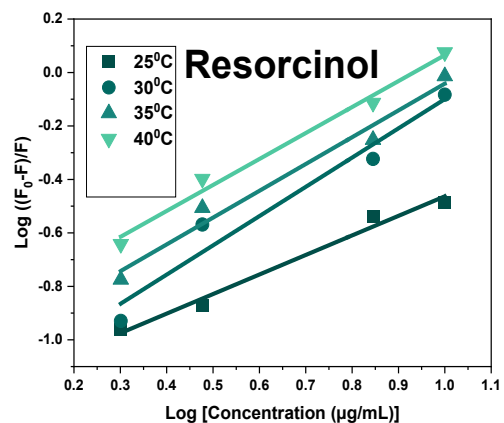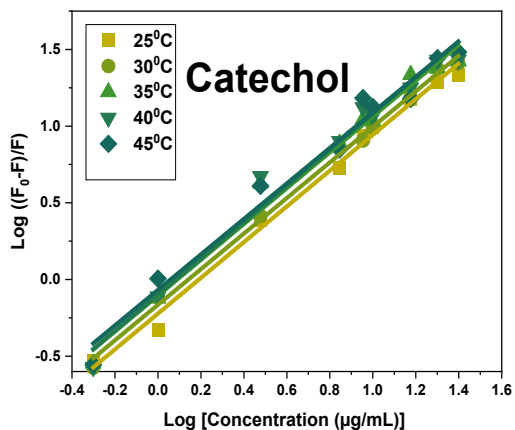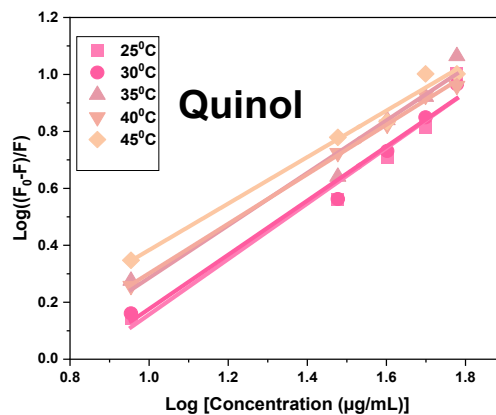

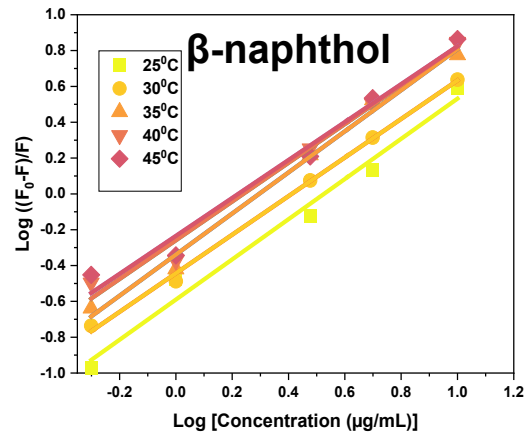

**Figure 2S.** The modified Stern–Volmer plots between  $\log (F_0 - F)/F$  and  $\log$  of the concentration of phenolic compounds at different temperatures.

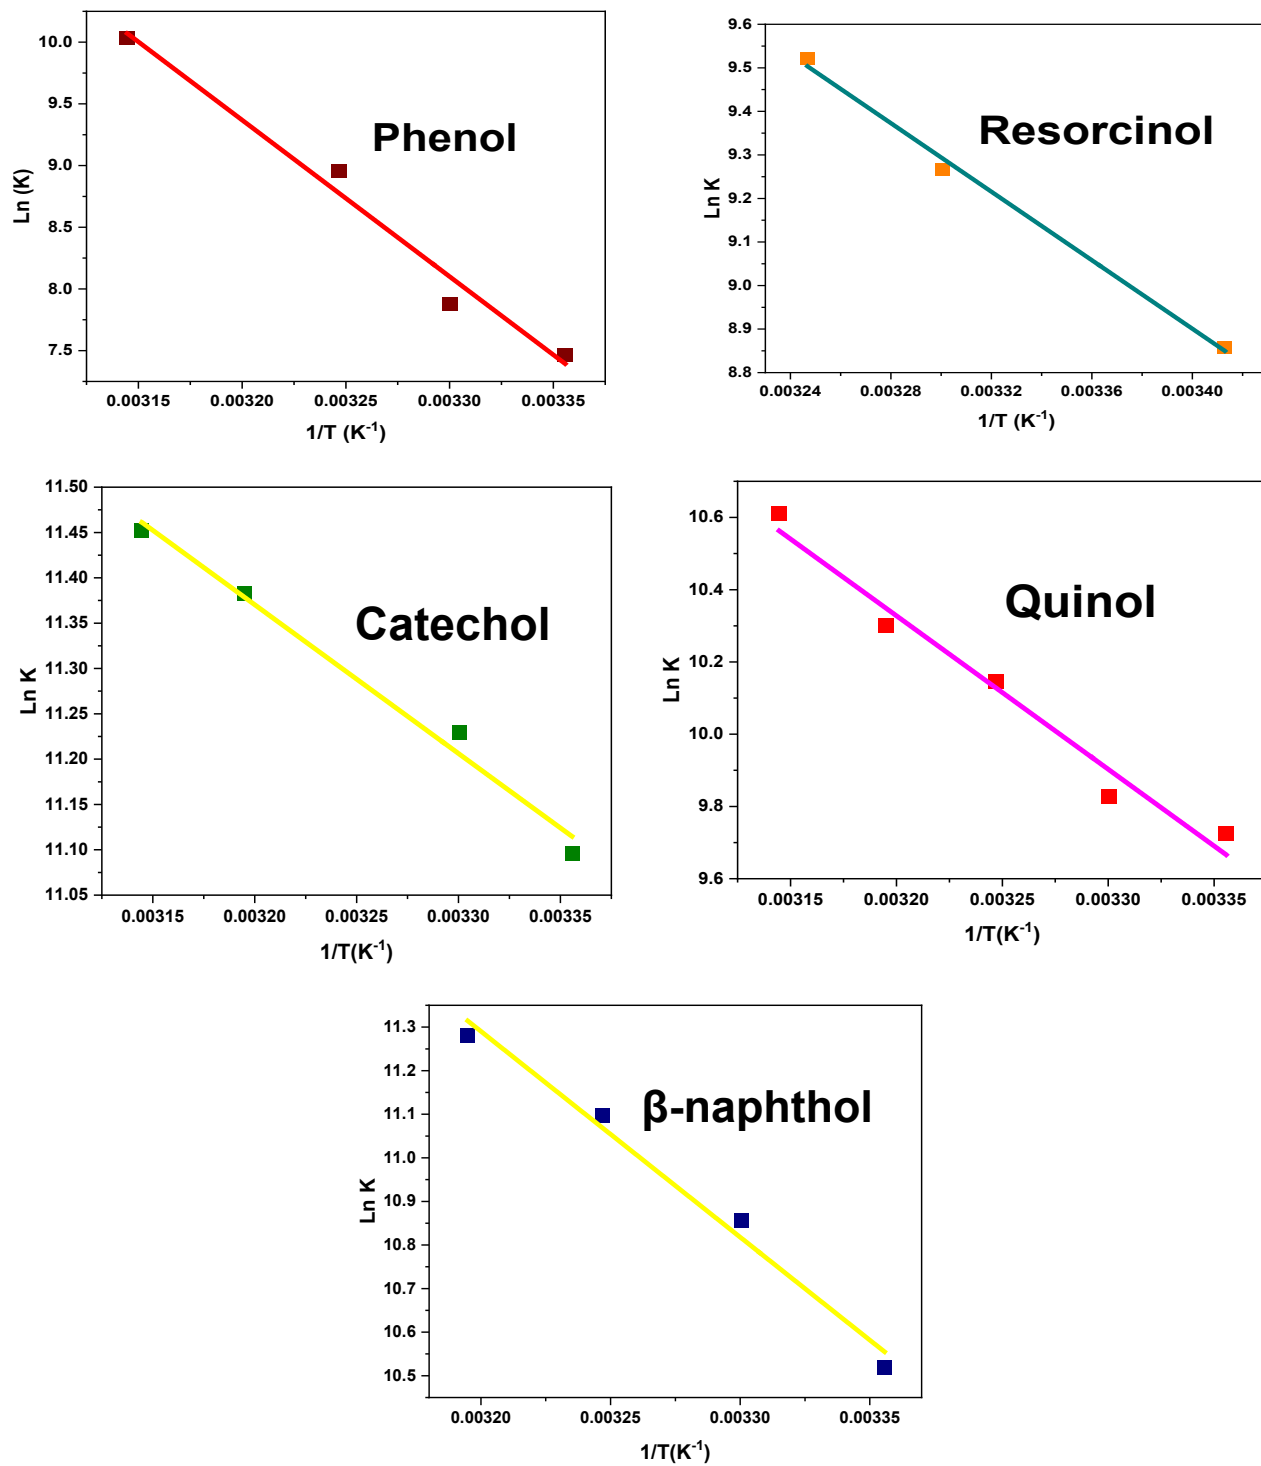

**Figure 3S.** The plot of Van't Hoff of Eu(III)-complex and phenolic compounds

**Table 1S.** Thermodynamic parameters for the interaction of Eu(III)-complex with the phenolic compounds under study

|                                    | Temperature<br>(T) | $\Delta H^0$<br>(KJ/mol) | $\Delta S^0$<br>(J/mol K) | $\Delta G^0$<br>(KJ/mol) |
|------------------------------------|--------------------|--------------------------|---------------------------|--------------------------|
| <b>Phenol</b>                      | 298 <sup>0</sup> K | <b>10.548</b>            | <b>415.430</b>            | -18.496                  |
|                                    | 303 <sup>0</sup> K |                          |                           | -19.853                  |
|                                    | 308 <sup>0</sup> K |                          |                           | -22.933                  |
|                                    | 318 <sup>0</sup> K |                          |                           | -26.531                  |
| <b>Resorcinol</b>                  | 298 <sup>0</sup> K | <b>32.703</b>            | <b>185.198</b>            | -21.579                  |
|                                    | 303 <sup>0</sup> K |                          |                           | -21.951                  |
|                                    | 308 <sup>0</sup> K |                          |                           | -23.347                  |
|                                    | 313 <sup>0</sup> K |                          |                           | -24.381                  |
| <b>Catechol</b>                    | 298 <sup>0</sup> K | <b>13.647</b>            | <b>138.211</b>            | -27.493                  |
|                                    | 303 <sup>0</sup> K |                          |                           | -28.290                  |
|                                    | 308 <sup>0</sup> K |                          |                           | -29.106                  |
|                                    | 313 <sup>0</sup> K |                          |                           | -29.622                  |
|                                    | 318 <sup>0</sup> K |                          |                           | -30.278                  |
| <b>Quinol</b>                      | 298 <sup>0</sup> K | <b>35.325</b>            | <b>198.912</b>            | -24.097                  |
|                                    | 303 <sup>0</sup> K |                          |                           | -24.755                  |
|                                    | 308 <sup>0</sup> K |                          |                           | -25.980                  |
|                                    | 313 <sup>0</sup> K |                          |                           | -26.806                  |
|                                    | 318 <sup>0</sup> K |                          |                           | -28.057                  |
| <b><math>\beta</math>-naphthol</b> | 298 <sup>0</sup> K | <b>39.264</b>            | <b>219.520</b>            | -26.063                  |
|                                    | 303 <sup>0</sup> K |                          |                           | -27.352                  |
|                                    | 308 <sup>0</sup> K |                          |                           | -28.418                  |
|                                    | 313 <sup>0</sup> K |                          |                           | -29.359                  |
|                                    | 318 <sup>0</sup> K |                          |                           | -29.975                  |

**Table 2S.** Tolerance limit of interfering species affecting on detection of phenolic compounds using Eu(III)-complex.

| Interfering species           | Tolerance                          |                                    |                                    |                                    |                                    |
|-------------------------------|------------------------------------|------------------------------------|------------------------------------|------------------------------------|------------------------------------|
|                               | Phenol                             | Resorcinol                         | Catechol                           | Quinol                             | $\beta$ -naphthol                  |
| Na <sup>+</sup>               | 0.68 <sup>Q</sup> $\mu\text{g/mL}$ | 0.84 <sup>Q</sup> $\mu\text{g/mL}$ | 1.41 <sup>Q</sup> $\mu\text{g/mL}$ | 1.41 <sup>Q</sup> $\mu\text{g/mL}$ | 1.69 <sup>Q</sup> $\mu\text{g/mL}$ |
| K <sup>+</sup>                | 1.49 <sup>Q</sup> $\mu\text{g/mL}$ | 1.22 <sup>Q</sup> $\mu\text{g/mL}$ | 2.25 <sup>Q</sup> $\mu\text{g/mL}$ | 2.25 <sup>Q</sup> $\mu\text{g/mL}$ | 1.12 <sup>Q</sup> $\mu\text{g/mL}$ |
| Ca <sup>2+</sup>              | 0.78 <sup>Q</sup> $\mu\text{g/mL}$ | 0.58 <sup>Q</sup> $\mu\text{g/mL}$ | 1.55 <sup>Q</sup> $\mu\text{g/mL}$ | 0.78 <sup>Q</sup> $\mu\text{g/mL}$ | 2.33 <sup>Q</sup> $\mu\text{g/mL}$ |
| Cu <sup>2+</sup>              | 1.12 <sup>Q</sup> $\mu\text{g/mL}$ | 0.80 <sup>Q</sup> $\mu\text{g/mL}$ | 1.06 <sup>Q</sup> $\mu\text{g/mL}$ | 0.80 <sup>Q</sup> $\mu\text{g/mL}$ | 1.59 <sup>Q</sup> $\mu\text{g/mL}$ |
| Pb <sup>2+</sup>              | 1.79 <sup>Q</sup> $\mu\text{g/mL}$ | 1.79 <sup>Q</sup> $\mu\text{g/mL}$ | 1.34 <sup>Q</sup> $\mu\text{g/mL}$ | 2.68 <sup>Q</sup> $\mu\text{g/mL}$ | 8.05 <sup>Q</sup> $\mu\text{g/mL}$ |
| Ni <sup>2+</sup>              | 0.48 <sup>Q</sup> $\mu\text{g/mL}$ | 0.75 <sup>Q</sup> $\mu\text{g/mL}$ | 1.28 <sup>Q</sup> $\mu\text{g/mL}$ | 0.32 <sup>Q</sup> $\mu\text{g/mL}$ | 1.12 <sup>Q</sup> $\mu\text{g/mL}$ |
| Mg <sup>2+</sup>              | 0.14 <sup>Q</sup> $\mu\text{g/mL}$ | 0.21 <sup>Q</sup> $\mu\text{g/mL}$ | 0.21 <sup>Q</sup> $\mu\text{g/mL}$ | 0.21 <sup>Q</sup> $\mu\text{g/mL}$ | 0.56 <sup>Q</sup> $\mu\text{g/mL}$ |
| Cl <sup>-</sup>               | 1.36 <sup>Q</sup> $\mu\text{g/mL}$ | 1.30 <sup>Q</sup> $\mu\text{g/mL}$ | 2.17 <sup>Q</sup> $\mu\text{g/mL}$ | 2.14 <sup>Q</sup> $\mu\text{g/mL}$ | 2.61 <sup>Q</sup> $\mu\text{g/mL}$ |
| SO <sub>4</sub> <sup>2-</sup> | 0.78 <sup>Q</sup> $\mu\text{g/mL}$ | 1.22 <sup>Q</sup> $\mu\text{g/mL}$ | 2.09 <sup>Q</sup> $\mu\text{g/mL}$ | 0.81 <sup>Q</sup> $\mu\text{g/mL}$ | 2.17 <sup>Q</sup> $\mu\text{g/mL}$ |
| NO <sub>3</sub> <sup>-</sup>  | 0.54 <sup>Q</sup> $\mu\text{g/mL}$ | 0.54 <sup>Q</sup> $\mu\text{g/mL}$ | 0.40 <sup>Q</sup> $\mu\text{g/mL}$ | 0.81 <sup>Q</sup> $\mu\text{g/mL}$ | 2.42 <sup>Q</sup> $\mu\text{g/mL}$ |
| PO <sub>4</sub> <sup>3-</sup> | 2.83 <sup>Q</sup> $\mu\text{g/mL}$ | 1.13 <sup>Q</sup> $\mu\text{g/mL}$ | 1.70 <sup>Q</sup> $\mu\text{g/mL}$ | 2.83 <sup>Q</sup> $\mu\text{g/mL}$ | 2.11 <sup>Q</sup> $\mu\text{g/mL}$ |
| CO <sub>3</sub> <sup>2-</sup> | 1.21 <sup>Q</sup> $\mu\text{g/mL}$ | 0.81 <sup>Q</sup> $\mu\text{g/mL}$ | 1.62 <sup>Q</sup> $\mu\text{g/mL}$ | 2.02 <sup>Q</sup> $\mu\text{g/mL}$ | 4.04 <sup>Q</sup> $\text{mg/L}$    |
| p.Cresol                      | 1.50 <sup>Q</sup> $\mu\text{g/mL}$ | 2.50 <sup>Q</sup> $\mu\text{g/mL}$ | 1.50 <sup>Q</sup> $\mu\text{g/mL}$ | 2.5 <sup>Q</sup> $\mu\text{g/mL}$  | 5 <sup>Q</sup> $\mu\text{g/mL}$    |
| m.Cresol                      | 2 <sup>Q</sup> $\mu\text{g/mL}$    | 3.50 <sup>Q</sup> $\mu\text{g/mL}$ | 2 <sup>Q</sup> $\mu\text{g/mL}$    | 2.5 <sup>Q</sup> $\mu\text{g/mL}$  | 3 <sup>Q</sup> $\mu\text{g/mL}$    |
| $\alpha$ -naphthol            | 1 <sup>Q</sup> $\mu\text{g/mL}$    | 1.50 <sup>Q</sup> $\mu\text{g/mL}$ | 1.5 <sup>Q</sup> $\mu\text{g/mL}$  | 1.5 <sup>Q</sup> $\mu\text{g/mL}$  | 2 <sup>Q</sup> $\mu\text{g/mL}$    |
| Pyrogallol                    | 0.5 <sup>Q</sup> $\mu\text{g/mL}$  | 0.50 <sup>Q</sup> $\mu\text{g/mL}$ | 1 <sup>Q</sup> $\mu\text{g/mL}$    | 1 <sup>Q</sup> $\mu\text{g/mL}$    | 1 <sup>Q</sup> $\mu\text{g/mL}$    |

<sup>Q</sup> : quenching effect

**Table 3S.** Determination of Phenolic Compounds in different types of wastewater samples using Standard Addition method.

|                     | <b>Added<br/>(<math>\mu\text{g/mL}</math>)</b> | <b>Found<br/>(<math>\mu\text{g/mL}</math>)</b> | <b>Recovery (%)</b> | <b>RSD (n=3) %</b> |
|---------------------|------------------------------------------------|------------------------------------------------|---------------------|--------------------|
| <b>Sample (I)</b>   | <b>10</b>                                      | <b>10.8</b>                                    | <b>108%</b>         | <b>1.73%</b>       |
|                     | <b>15</b>                                      | <b>15.2</b>                                    | <b>102%</b>         | <b>1.10%</b>       |
|                     | <b>20</b>                                      | <b>18.9</b>                                    | <b>95%</b>          | <b>0.35%</b>       |
| <b>Sample (II)</b>  | <b>10</b>                                      | <b>9.5</b>                                     | <b>95%</b>          | <b>1.82%</b>       |
|                     | <b>15</b>                                      | <b>13.7</b>                                    | <b>91%</b>          | <b>2.96%</b>       |
|                     | <b>20</b>                                      | <b>21.1</b>                                    | <b>105%</b>         | <b>1.92%</b>       |
| <b>Sample (III)</b> | <b>10</b>                                      | <b>10.4</b>                                    | <b>104%</b>         | <b>1.91%</b>       |
|                     | <b>15</b>                                      | <b>14.9</b>                                    | <b>99.9%</b>        | <b>2.51%</b>       |
|                     | <b>20</b>                                      | <b>19.6</b>                                    | <b>98.0%</b>        | <b>2.00%</b>       |
